# Supplementary material for: Characteristics of Cancer Patients in the World Trade Center Environmental Health Center
Source: PubMed Central journal article supplement (PMC7578998; doi:10.3390/ijerph17197190), 2020-10-01
Supplement: ijerph-17-07190-s001.pdf [file ijerph-17-07190-s001.pdf]

**Table S1:** The list of cancers included in the WTC Pan-cancer database.

| <b>Cancer Type</b>          |
|-----------------------------|
| Ampulla of vater            |
| Anal canal                  |
| Bone                        |
| Brain and spinal cord       |
| Breast                      |
| Cervix uteri                |
| Colon and rectum            |
| Connective and soft tissue  |
| Corpus uteri                |
| Esophagus                   |
| Extrahepatic bile duct      |
| Fallopian tube              |
| Gallbladder                 |
| Testis                      |
| Ovary                       |
| Head and neck sites         |
| Kidney                      |
| Leukemia                    |
| Liver                       |
| Lung                        |
| Lymphoma                    |
| Melanoma of the skin        |
| Mesothelioma                |
| Myelodysplastic syndrome    |
| Myeloma                     |
| Myeloproliferative neoplasm |
| Neuroendocrine tumor        |
| Ophthalmic site tumor       |
| Pancreas                    |
| Penis                       |
| Peritoneum/retroperitoneum  |
| Prostate                    |
| Small Intestine             |
| Soft tissue sarcoma         |
| Stomach                     |
| Thymus                      |
| Thyroid                     |
| Urethra                     |
| Urinary bladder             |
| Vagina                      |
| Vulva                       |

**Table S2:** The median age of diagnosis and median latency from 9/11 for non-common cancers in both sexes.

| Cancer type           | All (n= 2999) |                                        |                               | Male (n= 1623) |                                        |                               | Female (n= 1376) |                                        |                               |
|-----------------------|---------------|----------------------------------------|-------------------------------|----------------|----------------------------------------|-------------------------------|------------------|----------------------------------------|-------------------------------|
|                       | n (%)         | Median age of diagnosis (range) (year) | Median latency (range) (year) | n (%)          | Median age of diagnosis (range) (year) | Median latency (range) (year) | n (%)            | Median age of diagnosis (range) (year) | Median latency (range) (year) |
| Liver                 | 28 (1)        | 62 (48, 78)                            | 13.3 (8, 17.8)                | 19 (1)         | 62 (49, 78)                            | 13.7 (8, 17.5)                | 9 (1)            | 62 (48, 68)                            | 12.9 (11.4, 17.8)             |
| Brain and spinal cord | 26 (1)        | 57 (36, 81)                            | 14 (1.3, 17.8)                | 16 (1)         | 60 (36, 81)                            | 14.2 (8, 17.8)                | 10 (1)           | 56 (36, 81)                            | 12.8 (1.3, 17.6)              |

|                             |        |               |                   |        |               |                   |        |               |                   |
|-----------------------------|--------|---------------|-------------------|--------|---------------|-------------------|--------|---------------|-------------------|
| Esophagus                   | 24 (1) | 57 (32, 72)   | 12.2 (4, 16.6)    | 21 (1) | 58 (32, 72)   | 12.7 (4, 16.6)    | 3 (0)  | 51 (47, 65)   | 11.2 (8.8, 11.8)  |
| Myeloproliferative neoplasm | 19 (1) | 60 (5, 80)    | 13.8 (1.3, 16.6)  | 15 (1) | 62 (5, 80)    | 13.8 (1.3, 16.6)  | 4 (0)  | 53.5 (45, 80) | 10.1 (3.2, 16.5)  |
| Small Intestine             | 18 (1) | 57.5 (38, 78) | 13.2 (5.4, 16.7)  | 10 (1) | 58 (38, 72)   | 14 (7.8, 16.5)    | 8 (1)  | 54 (47, 78)   | 12.3 (5.4, 16.7)  |
| Soft tissue sarcoma         | 16 (1) | 53.5 (29, 75) | 12.2 (6.3, 16.4)  | 11 (1) | 53.5 (29, 75) | 10.8 (6.3, 16.4)  | 5 (0)  | 52.5 (31, 58) | 14.5 (10.2, 14.7) |
| Myelodysplastic syndrome    | 14 (0) | 57 (43, 86)   | 13.8 (1.9, 16.4)  | 10 (1) | 65 (53, 86)   | 14.3 (1.9, 16.4)  | 4 (0)  | 49 (43, 58)   | 12.8 (7.9, 14.3)  |
| Corpus uteri                | 10 (0) | 61.5 (52, 72) | 14.1 (5.2, 16.9)  |        |               |                   | 10 (1) | 61.5 (52, 72) | 14.1 (5.2, 16.9)  |
| Extrahepatic bile duct      | 7 (0)  | 65.5 (54, 72) | 14.8 (9.2, 16.8)  | 3 (0)  | 67 (64, 72)   | 15.2 (14.8, 16.8) | 4 (0)  | 61 (54, 70)   | 13.2 (9.2, 14.8)  |
| Cervix uteri                | 6 (0)  | 48.5 (44, 59) | 12.1 (5.7, 16.6)  |        |               |                   | 6 (0)  | 48.5 (44, 59) | 12.1 (5.7, 16.6)  |
| Thymus                      | 6 (0)  | 57 (43, 71)   | 13.7 (12.2, 15.1) | 5 (0)  | 58 (43, 71)   | 13.2 (12.2, 15.1) | 1 (0)  | 57 (57, 57)   | 15 (15, 15)       |
| Bone                        | 5 (0)  | 56.5 (33, 73) | 13.2 (9.2, 15.4)  | 4 (0)  | 59 (54, 73)   | 13.5 (9.2, 15.4)  | 1 (0)  | 33 (33, 33)   | 12.8 (12.8, 12.8) |
| Ophthalmic site tumor       | 4 (0)  | 54 (36, 69)   | 13.3 (5.3, 16.2)  | 2 (0)  | 54 (49, 59)   | 13.3 (11, 15.6)   | 2 (0)  | 52.5 (36, 69) | 10.8 (5.3, 16.2)  |
| Peritoneum/retrperitoneum   | 4 (0)  | 62 (50, 69)   |                   |        |               |                   | 4 (0)  | 62 (50, 69)   | 9.8 (8.0, 16.0)   |
| Ampulla of vater            | 3 (0)  | 63 (62, 76)   | 14.9 (13.2, 15.5) | 2 (0)  | 69 (62, 76)   | 14.3 (13.2, 15.5) | 1 (0)  | 63 (63, 63)   | 14.9 (14.9, 14.9) |
| Anal canal                  | 3 (0)  | 67 (43, 68)   | 14.2 (9.7, 15.8)  | 1 (0)  | 67 (67, 67)   | 9.7 (9.7, 9.7)    | 2 (0)  | 55.5 (43, 68) | 15 (14.2, 15.8)   |
| Fallopian tube              | 3 (0)  | 59 (52, 63)   | 15 (13.6, 16.9)   |        |               |                   | 3 (0)  | 59 (52, 63)   | 15 (13.6, 16.9)   |
| Penis                       | 3 (0)  | 56 (55, 61)   | 15.4 (15, 16.7)   | 3 (0)  | 56 (55, 61)   | 16 (15.4, 16.7)   |        |               | 15 (15, 15)       |
| Vulva                       | 3 (0)  | 71 (59, 77)   | 13.5 (12.1, 16)   |        |               | 13.5 (12.1, 16)   | 3 (0)  | 71 (59, 77)   |                   |
| Unknown primary site        | 3 (0)  | 50 (39, 69)   | 15.2 (14.9, 15.8) | 2 (0)  | 54.5 (40, 69) |                   | 7 (1)  | 50 (39, 69)   | 15.2 (14.9, 15.8) |
| Gallbladder                 | 2 (0)  | 65.5 (61, 70) | 13.1 (12, 14.2)   |        |               | 14.2 (14.2, 14.2) | 2 (0)  | 65.5 (61, 70) | 12 (12, 12)       |
| Connective and soft tissue  | 2 (0)  | 39.5 (39, 40) | 11.2 (9.7, 12.7)  | 1 (0)  | 40 (40, 40)   |                   | 1 (0)  | 39 (39, 39)   | 11.2 (9.7, 12.7)  |
| Neuroendocrine tumor        | 1 (0)  | 63 (63, 63)   | 13.6 (11.1, 16.1) | 1 (0)  | 63 (63, 63)   | 11.1 (11.1, 11.1) |        |               | 16.1 (16.1, 16.1) |
| Urethra                     | 1 (0)  | 72 (72, 72)   | 15.3 (15.3, 15.3) | 1 (0)  | 72 (72, 72)   | 15.3 (15.3, 15.3) |        |               |                   |
| Vagina                      | 1 (0)  | 66 (66, 66)   | 13.2 (13.2, 13.2) |        |               | 13.2 (13.2, 13.2) | 1 (0)  | 66 (66, 66)   |                   |
|                             |        |               | 14 (14, 14)       |        |               |                   |        |               | 14 (14, 14)       |
